# Supplementary material
Source: publisher figshare collection journal article supplement (https://frontiersin.figshare.com/ndownloader/files/30977833)
Supplement: Supplementary file [file 30977833]

# Olfactory signatures in the food-finding test in male and female mice with normal and AD-pathological aging with special concerns on the effects of social isolation

Daniela Marín-Pardo, Lydia Giménez-Llort

**Supplementary Table 1. Factorial analysis**

| Variables                  | F                | Factor Sex | Factor Genotype | Significance p value |
|----------------------------|------------------|------------|-----------------|----------------------|
| A. Food deprivation        |                  |            |                 |                      |
| Wpre                       | F(1,86)= 34.369  | S***       | G***            | p= 0.000             |
|                            | F(1,86)= 152.694 |            |                 | p= 0.000             |
| Wpos                       | F(1,86)=36.481   | S***       | G***            | p= 0.000             |
|                            | F(1,86)=210.954  |            |                 | p= 0.000             |
| %Wloss                     | F(1,86)=6.585    | S*         |                 | p= 0.012             |
| Final Weight               | F(1,86)=52.252   | S***       | G***            | p= 0.000             |
|                            | F(1,86)=223.375  |            |                 | p= 0.000             |
| B. Food-finding test       |                  |            |                 |                      |
| Latency of Smell           | F(1,86)=5.558    | S*         |                 | p= 0.021             |
| Latency of Finding Food    | F(1,86)=12.686   |            | G***            | p= 0.001             |
| Latency of Eating          | F(1,86)=41.984   |            | G***            | p= 0.000             |
| Time delay between actions |                  |            |                 |                      |
| Smelling- Finding          | F(1,86)=15.535   | (S*)       | G***            | p= 0.000             |
| Finding – Eating           | F(1,86)=28.649   |            | G***            | p= 0.000             |
| Smelling – Eating          | F(1,86)=44.539   |            | G***            | p= 0.000             |
|                            | F(1,86)=3.864    |            |                 | p= 0.053             |
| Naturalistic Isolation     |                  |            |                 |                      |
| A. Food deprivation        |                  |            |                 |                      |
| Wpre                       | F(2,43)= 30.546  |            | G***            | p= 0.000             |
| Wpos                       | F(2,43)=44.698   |            | G***            | p= 0.000             |
| Final Weight               | F(2,43)=52.114   |            | G***            | p= 0.000             |
| Food-finding test          |                  |            |                 |                      |
| Latency of Smell           | F(2,43)=3.661    |            | G*              | p= 0.034             |
| Latency of Finding         | F(2,43)=20.275   |            | G***            | p= 0.000             |
| Latency of Eating          | F(2,43)=34.979   |            | G***            | p= 0.000             |
| Time delay between actions |                  |            |                 |                      |
| Smelling- Finding          | F(2,43)=11.517   |            | G***            | p= 0.000             |
| Finding – Eating           | F(2,43)=10.930   |            | G***            | p= 0.000             |
| Smelling – Eating          | F(2,43)=19.130   |            | G***            | p= 0.000             |

Abbreviations: Wpre, initial weight before fasting; Wpost, weight after fasting; % Wloss, % weight lost overnight; Final W, final weight 24h later. Statistics: G, genotype, \*  $p < 0.05$ , \*\*  $p < 0.01$ , \*\*\*  $p < 0.001$  vs. NTg mice of the same sex; S, sex, \*  $p < 0.05$ , \*\*  $p < 0.01$ , \*\*\*  $p < 0.001$  vs. male of the same genotype.
